# Supplementary material for: Prevalence of problematic feeding in young children born prematurely: a meta-analysis
Source: PubMed Central journal article supplement (PMC7936467; doi:10.1186/s12887-021-02574-7), 2021-03-06

Identification

Screening

Eligibility

Included

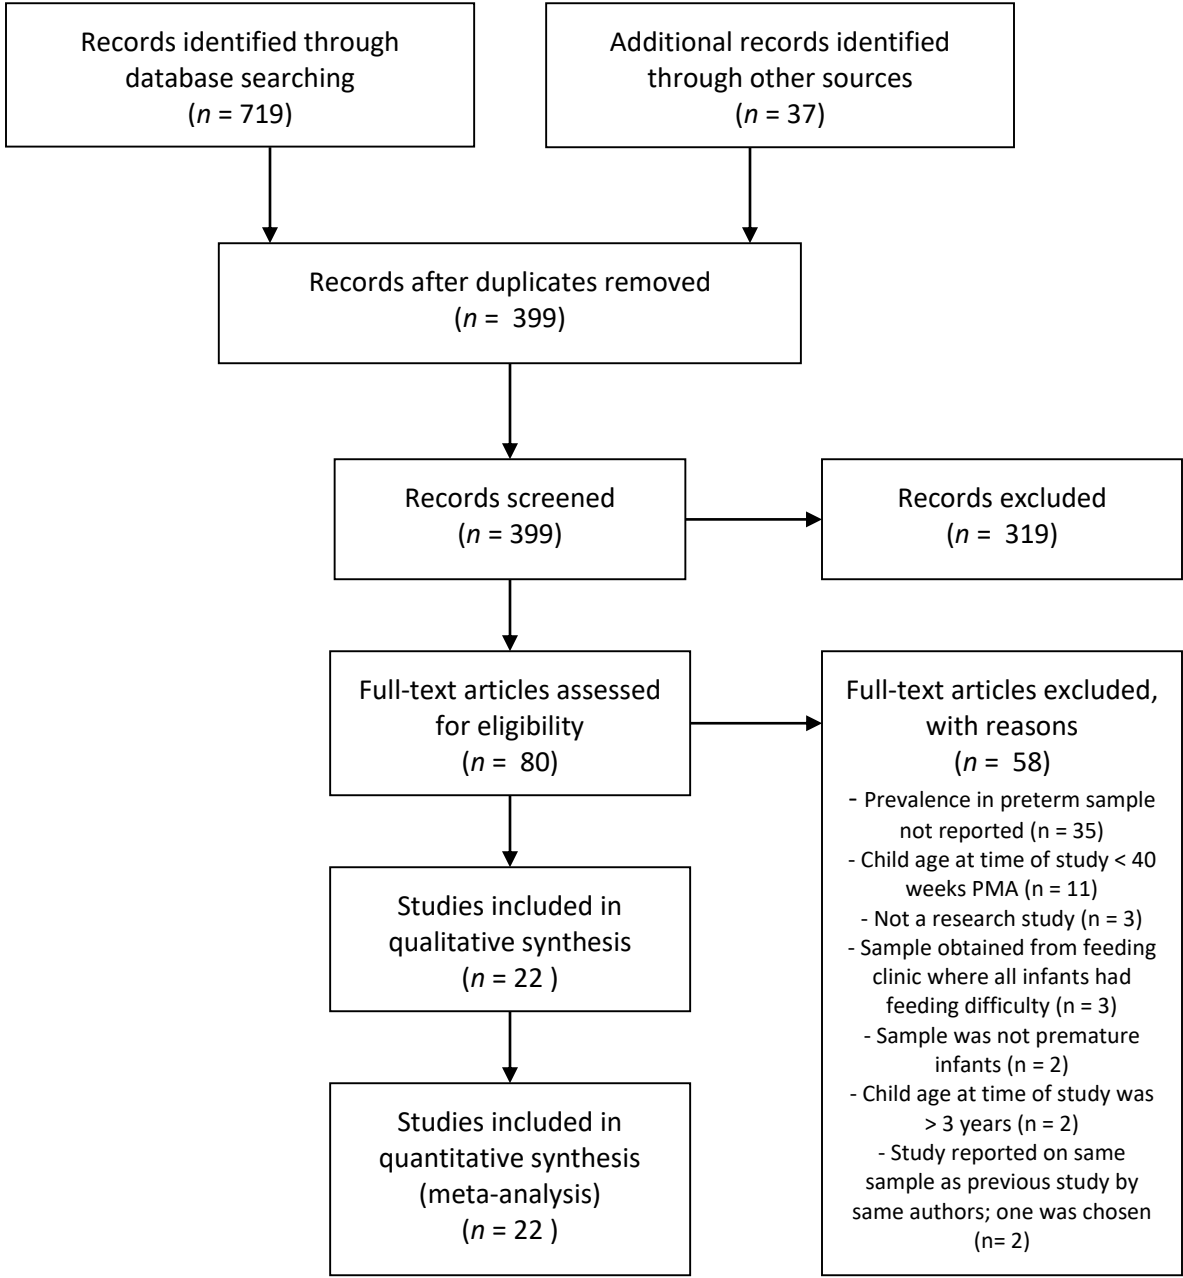

Supplement: 12887_2021_2574_MOESM1_ESM.pdf [file 12887_2021_2574_MOESM1_ESM.pdf]
